# Supplementary material
Source: MDPI journal article supplement (https://www.mdpi.com/2072-4292/14/22/5903)
Supplement: s1 [file s1]

**Table S1.** List of PALSAR-2 quadruple data used in this study.

|                       |
|-----------------------|
| ALOS2229710210-180824 |
| ALOS2229710200-180824 |
| ALOS2229710190-180824 |
| ALOS2229710180-180824 |
| ALOS2229710170-180824 |
| ALOS2231780210-180907 |
| ALOS2231780200-180907 |
| ALOS2231780190-180907 |
| ALOS2231780180-180907 |
| ALOS2231780170-180907 |
| ALOS2235920200-181005 |
| ALOS2235920190-181005 |
| ALOS2235920180-181005 |
| ALOS2235920170-181005 |
| ALOS2235920210-181005 |
| ALOS2237990210-181019 |
| ALOS2237990200-181019 |
| ALOS2237990190-181019 |
| ALOS2237990180-181019 |
| ALOS2237990170-181019 |
| ALOS2242130210-181116 |
| ALOS2242130200-181116 |
| ALOS2242130190-181116 |
| ALOS2242130180-181116 |
| ALOS2242130170-181116 |
| ALOS2246270210-181214 |
| ALOS2246270200-181214 |
| ALOS2246270190-181214 |
| ALOS2246270180-181214 |
| ALOS2246270170-181214 |
| ALOS2250410200-190111 |
| ALOS2250410190-190111 |
| ALOS2250410180-190111 |
| ALOS2250410170-190111 |
| ALOS2250410210-190111 |
| ALOS2254550210-190208 |
| ALOS2254550200-190208 |
| ALOS2254550190-190208 |
| ALOS2254550180-190208 |
| ALOS2254550170-190208 |

|                       |
|-----------------------|
| ALOS2258690210-190308 |
| ALOS2258690200-190308 |
| ALOS2258690190-190308 |
| ALOS2258690180-190308 |
| ALOS2258690170-190308 |
| ALOS2262830170-190405 |
| ALOS2262830210-190405 |
| ALOS2262830200-190405 |
| ALOS2262830190-190405 |
| ALOS2262830180-190405 |
| ALOS2266970200-190503 |
| ALOS2266970190-190503 |
| ALOS2266970180-190503 |
| ALOS2266970170-190503 |
| ALOS2266970210-190503 |
| ALOS2269040210-190517 |
| ALOS2269040200-190517 |
| ALOS2269040190-190517 |
| ALOS2269040180-190517 |
| ALOS2269040170-190517 |
| ALOS2271110210-190531 |
| ALOS2271110200-190531 |
| ALOS2271110190-190531 |
| ALOS2271110180-190531 |
| ALOS2271110170-190531 |
| ALOS2273180210-190614 |
| ALOS2273180200-190614 |
| ALOS2273180190-190614 |
| ALOS2273180180-190614 |
| ALOS2273180170-190614 |
| ALOS2275250200-190628 |
| ALOS2275250190-190628 |
| ALOS2275250180-190628 |
| ALOS2275250170-190628 |
| ALOS2275250210-190628 |
| ALOS2279390210-190726 |
| ALOS2279390200-190726 |
| ALOS2279390190-190726 |
| ALOS2279390180-190726 |
| ALOS2279390170-190726 |
| ALOS2283530210-190823 |

|                       |
|-----------------------|
| ALOS2283530200-190823 |
| ALOS2283530190-190823 |
| ALOS2283530180-190823 |
| ALOS2283530170-190823 |
| ALOS2287670210-190920 |
| ALOS2287670200-190920 |
| ALOS2287670190-190920 |
| ALOS2287670180-190920 |
| ALOS2287670170-190920 |
| ALOS2291810200-191018 |
| ALOS2291810190-191018 |
| ALOS2291810180-191018 |
| ALOS2291810170-191018 |
| ALOS2291810210-191018 |
| ALOS2295950200-191115 |
| ALOS2295950190-191115 |
| ALOS2295950180-191115 |
| ALOS2295950170-191115 |
| ALOS2295950210-191115 |
| ALOS2304230210-200110 |
| ALOS2304230200-200110 |
| ALOS2304230190-200110 |
| ALOS2304230180-200110 |
| ALOS2304230170-200110 |
| ALOS2308370210-200207 |
| ALOS2308370200-200207 |
| ALOS2308370190-200207 |
| ALOS2308370180-200207 |
| ALOS2308370170-200207 |
| ALOS2312510200-200306 |
| ALOS2312510190-200306 |
| ALOS2312510180-200306 |
| ALOS2312510170-200306 |
| ALOS2312510210-200306 |
| ALOS2316650210-200403 |
| ALOS2316650200-200403 |
| ALOS2316650190-200403 |
| ALOS2316650180-200403 |
| ALOS2316650170-200403 |
| ALOS2320790210-200501 |
| ALOS2320790200-200501 |

|                       |
|-----------------------|
| ALOS2320790190-200501 |
| ALOS2320790180-200501 |
| ALOS2320790170-200501 |
| ALOS2322860210-200515 |
| ALOS2322860200-200515 |
| ALOS2322860190-200515 |
| ALOS2322860180-200515 |
| ALOS2322860170-200515 |
| ALOS2324930200-200529 |
| ALOS2324930190-200529 |
| ALOS2324930180-200529 |
| ALOS2324930170-200529 |
| ALOS2324930210-200529 |
| ALOS2329070210-200626 |
| ALOS2329070200-200626 |
| ALOS2329070190-200626 |
| ALOS2329070180-200626 |
| ALOS2329070170-200626 |
| ALOS2331140210-200710 |
| ALOS2331140200-200710 |
| ALOS2331140190-200710 |
| ALOS2331140180-200710 |
| ALOS2331140170-200710 |
| ALOS2333210210-200724 |
| ALOS2333210200-200724 |
| ALOS2333210190-200724 |
| ALOS2333210180-200724 |
| ALOS2333210170-200724 |
| ALOS2335280200-200807 |
| ALOS2335280190-200807 |
| ALOS2335280180-200807 |
| ALOS2335280170-200807 |
| ALOS2335280210-200807 |
| ALOS2337350190-200821 |
| ALOS2337350200-200821 |
| ALOS2337350170-200821 |
| ALOS2337350180-200821 |
| ALOS2337350210-200821 |
| ALOS2339420210-200904 |
| ALOS2339420200-200904 |
| ALOS2339420190-200904 |

|                       |
|-----------------------|
| ALOS2339420180-200904 |
| ALOS2339420170-200904 |
| ALOS2341490210-200918 |
| ALOS2341490200-200918 |
| ALOS2341490190-200918 |
| ALOS2341490180-200918 |
| ALOS2341490170-200918 |
| ALOS2343560200-201002 |
| ALOS2343560190-201002 |
| ALOS2343560180-201002 |
| ALOS2343560170-201002 |
| ALOS2343560210-201002 |
| ALOS2345630190-201016 |
| ALOS2345630210-201016 |
| ALOS2345630200-201016 |
| ALOS2345630180-201016 |
| ALOS2345630170-201016 |
| ALOS2347700200-201030 |
| ALOS2347700190-201030 |
| ALOS2347700180-201030 |
| ALOS2347700170-201030 |
| ALOS2347700210-201030 |
| ALOS2349770210-201113 |
| ALOS2349770200-201113 |
| ALOS2349770190-201113 |
| ALOS2349770180-201113 |
| ALOS2349770170-201113 |
| ALOS2351840200-201127 |
| ALOS2351840190-201127 |
| ALOS2351840180-201127 |
| ALOS2351840170-201127 |
| ALOS2351840210-201127 |
| ALOS2353910210-201211 |
| ALOS2353910200-201211 |
| ALOS2353910190-201211 |
| ALOS2353910180-201211 |
| ALOS2353910170-201211 |
| ALOS2355980210-201225 |
| ALOS2355980200-201225 |
| ALOS2355980190-201225 |
| ALOS2355980180-201225 |

|                       |
|-----------------------|
| ALOS2355980170-201225 |
| ALOS2358050210-210108 |
| ALOS2358050200-210108 |
| ALOS2358050190-210108 |
| ALOS2358050180-210108 |
| ALOS2358050170-210108 |
| ALOS2360120200-210122 |
| ALOS2360120190-210122 |
| ALOS2360120180-210122 |
| ALOS2360120170-210122 |
| ALOS2360120210-210122 |
| ALOS2362190210-210205 |
| ALOS2362190200-210205 |
| ALOS2362190190-210205 |
| ALOS2362190180-210205 |
| ALOS2362190170-210205 |
| ALOS2364260200-210219 |
| ALOS2364260190-210219 |
| ALOS2364260180-210219 |
| ALOS2364260170-210219 |
| ALOS2364260210-210219 |
| ALOS2374610210-210430 |
| ALOS2374610200-210430 |
| ALOS2374610190-210430 |
| ALOS2374610180-210430 |
| ALOS2374610170-210430 |
| ALOS2376680200-210514 |
| ALOS2376680190-210514 |
| ALOS2376680180-210514 |
| ALOS2376680170-210514 |
| ALOS2376680210-210514 |
| ALOS2378750210-210528 |
| ALOS2378750200-210528 |
| ALOS2378750190-210528 |
| ALOS2378750180-210528 |
| ALOS2378750170-210528 |
| ALOS2380820210-210611 |
| ALOS2380820200-210611 |
| ALOS2380820190-210611 |
| ALOS2380820180-210611 |
| ALOS2380820170-210611 |

|                       |
|-----------------------|
| ALOS2382890210-210625 |
| ALOS2382890200-210625 |
| ALOS2382890190-210625 |
| ALOS2382890180-210625 |
| ALOS2382890170-210625 |
| ALOS2384960200-210709 |
| ALOS2384960190-210709 |
| ALOS2384960180-210709 |
| ALOS2384960170-210709 |
| ALOS2384960210-210709 |
| ALOS2387030210-210723 |
| ALOS2387030200-210723 |
| ALOS2387030190-210723 |
| ALOS2387030180-210723 |
| ALOS2387030170-210723 |
| ALOS2389100210-210806 |
| ALOS2389100200-210806 |
| ALOS2389100190-210806 |
| ALOS2389100180-210806 |
| ALOS2389100170-210806 |
| ALOS2391170210-210820 |
| ALOS2391170200-210820 |
| ALOS2391170190-210820 |
| ALOS2391170180-210820 |
| ALOS2391170170-210820 |
| ALOS2393240200-210903 |
| ALOS2393240190-210903 |
| ALOS2393240180-210903 |
| ALOS2393240170-210903 |
| ALOS2393240210-210903 |
| ALOS2395310210-210917 |
| ALOS2395310200-210917 |
| ALOS2395310190-210917 |
| ALOS2395310180-210917 |
| ALOS2395310170-210917 |
| ALOS2397303420-211001 |
| ALOS2397303410-211001 |
| ALOS2399450210-211015 |
| ALOS2399450200-211015 |
| ALOS2399450190-211015 |
| ALOS2399450180-211015 |

|                       |
|-----------------------|
| ALOS2399450170-211015 |
| ALOS2401520210-211029 |
| ALOS2401520200-211029 |
| ALOS2401520190-211029 |
| ALOS2401520180-211029 |
| ALOS2401520170-211029 |
| ALOS2403590180-211112 |
| ALOS2403590170-211112 |
| ALOS2403590210-211112 |
| ALOS2403590200-211112 |
| ALOS2403590190-211112 |
| ALOS2405660210-211126 |
| ALOS2405660200-211126 |
| ALOS2405660190-211126 |
| ALOS2405660180-211126 |
| ALOS2405660170-211126 |
| ALOS2407730210-211210 |
| ALOS2407730200-211210 |
| ALOS2407730190-211210 |
| ALOS2407730180-211210 |
| ALOS2407730170-211210 |

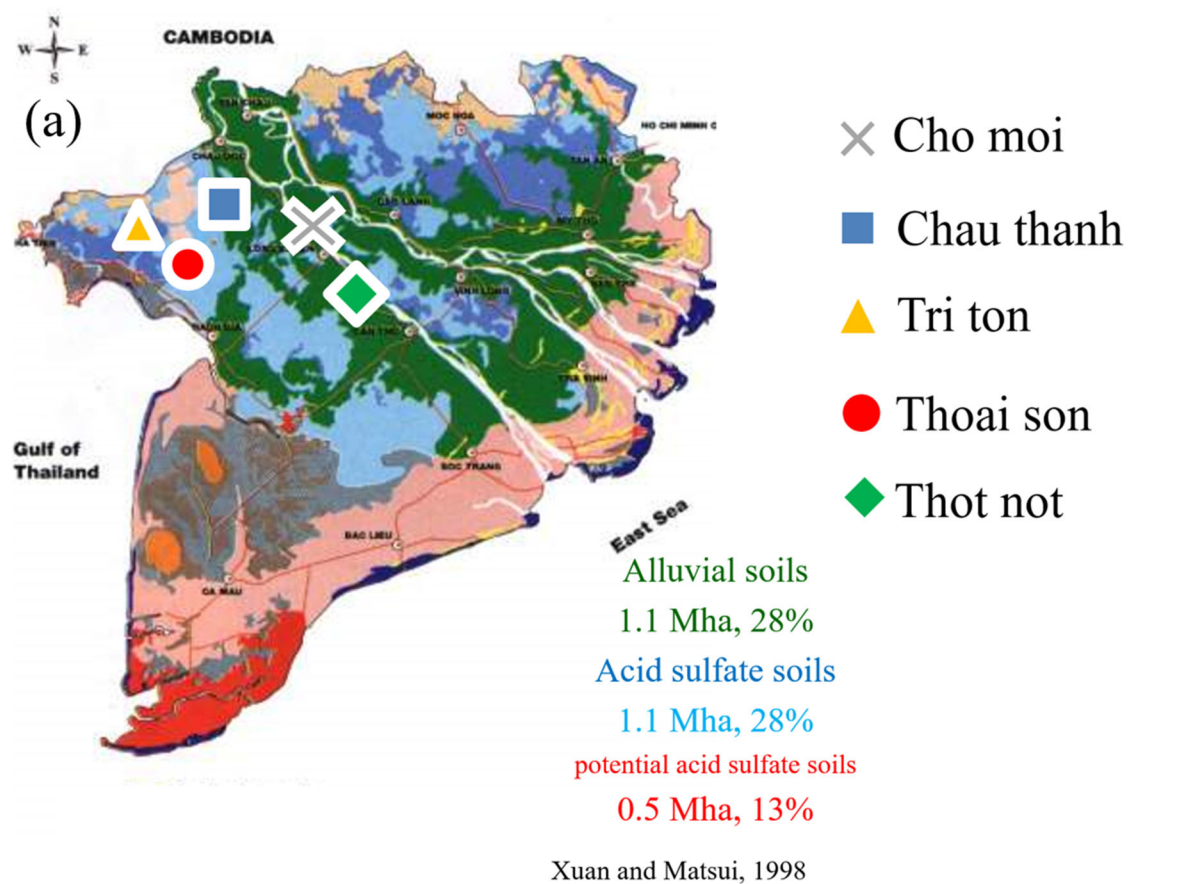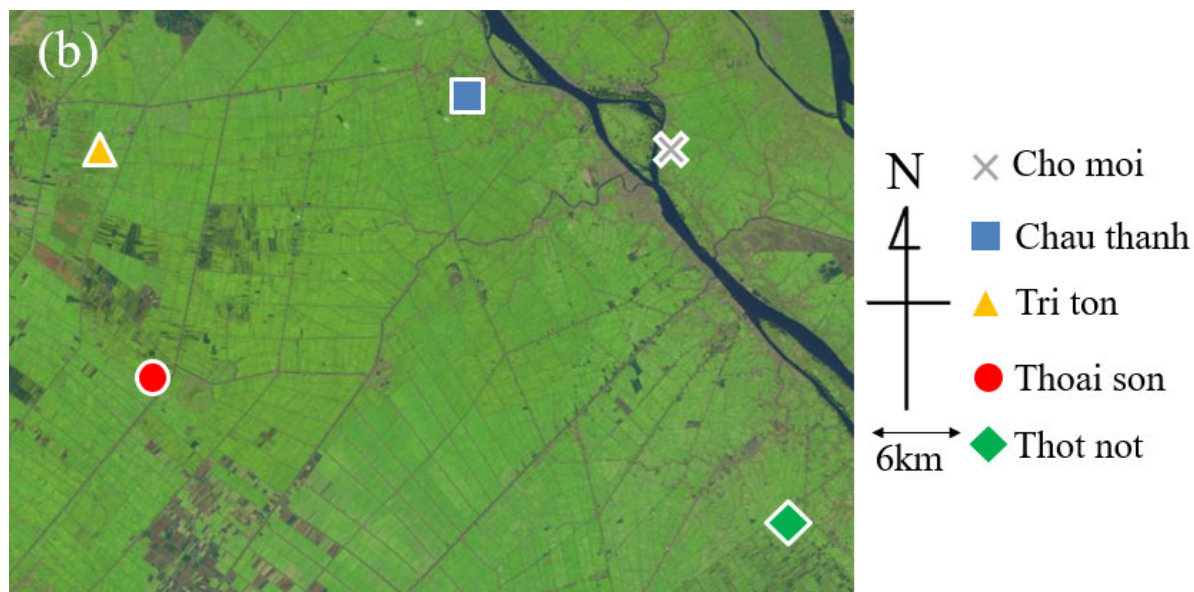

**Figure S1.** Site location in the Mekong delta (subfigure a) and Sentinel-2's multispectral images surrounding target sites observed on 6 February 2016 (subfigure b).

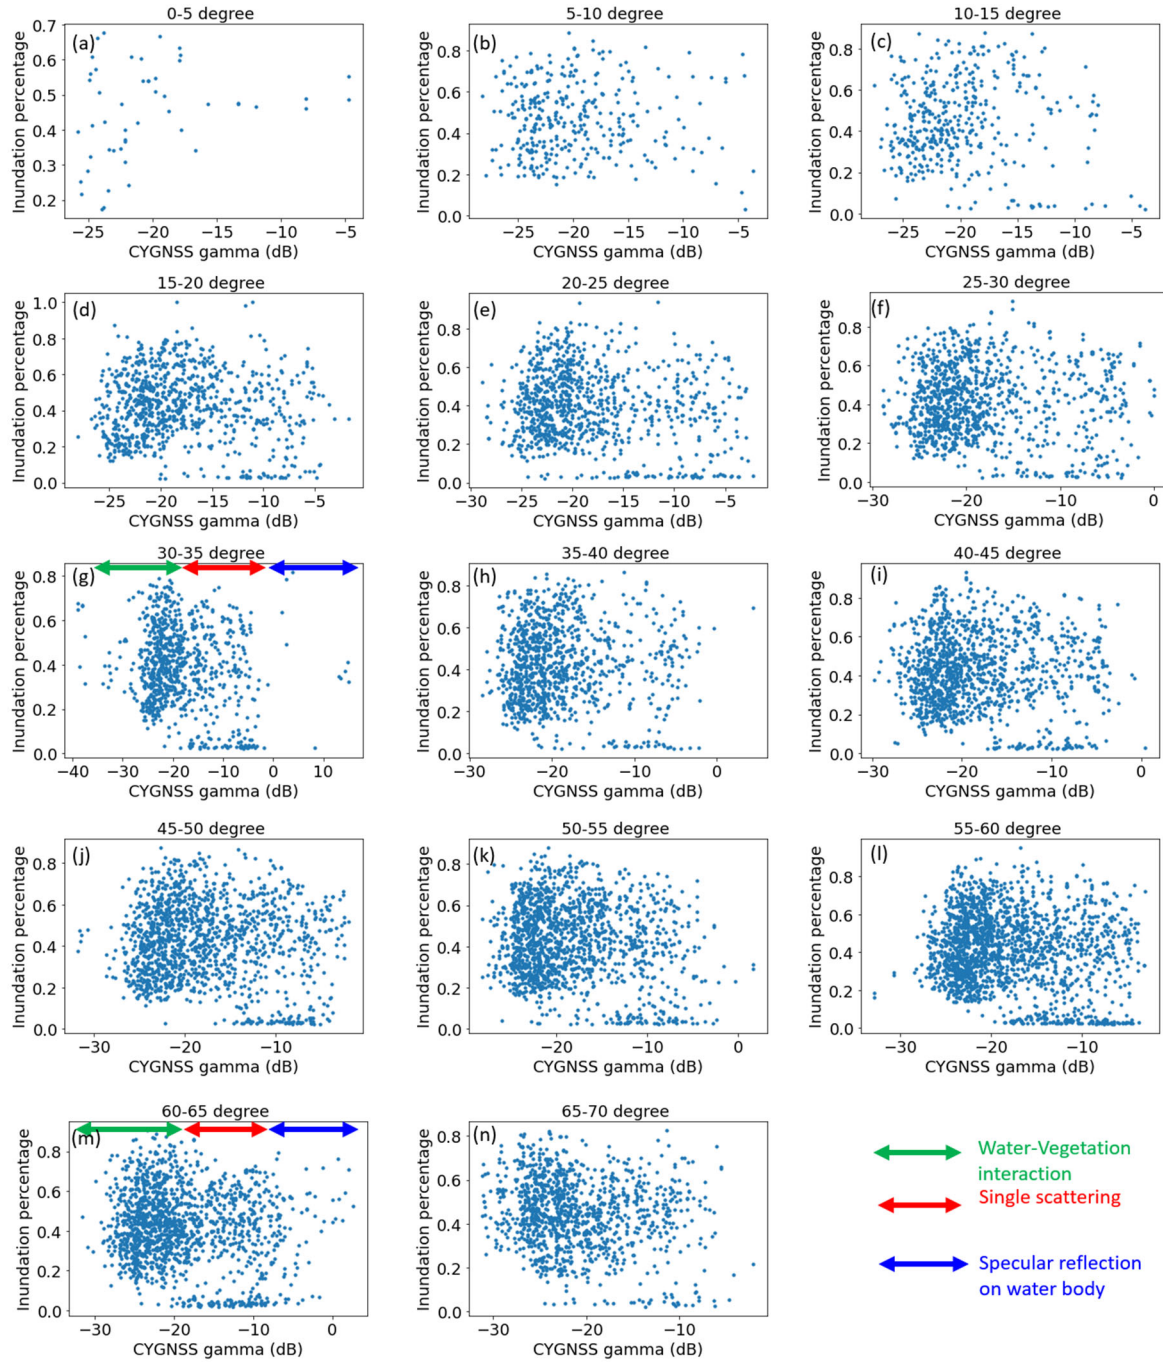

**Figure S2.** Two-dimensional scatterplots between the CyGNSS reflectivity  $\Gamma$  (dB) and spatial inundation percentage values at different specular point incidence angles. The statistical analysis results of these relationships are described in Tables S2 and S3.

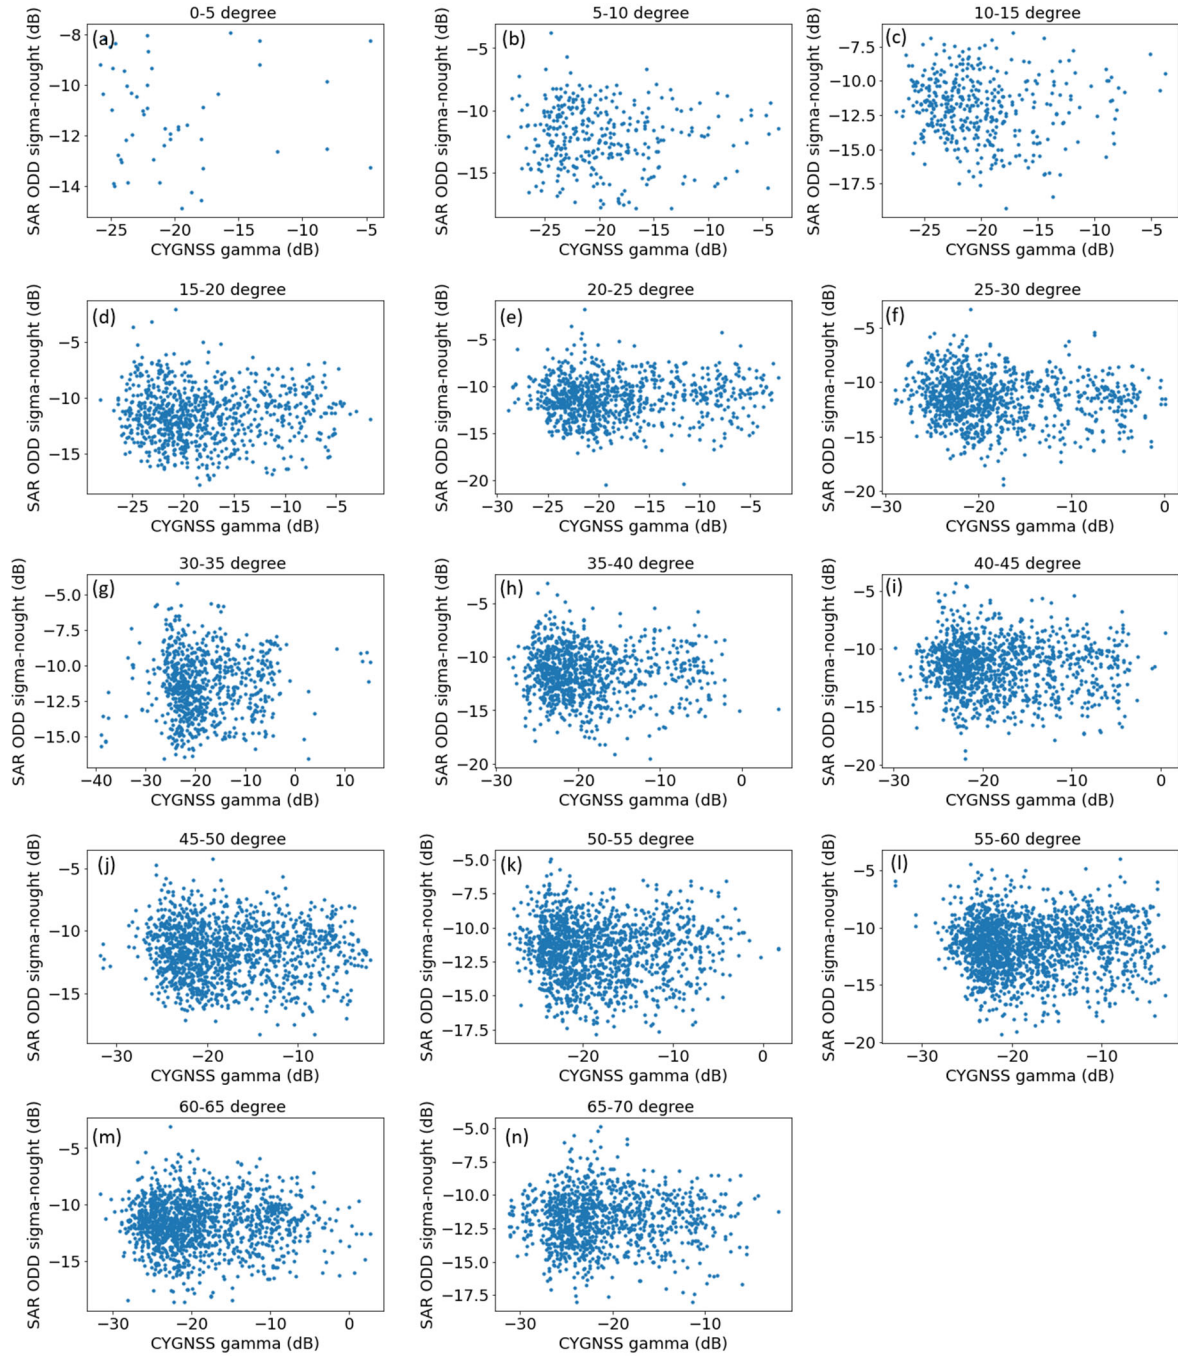

**Figure S3.** Two-dimensional scatterplots between the CyGNSS reflectivity  $\Gamma$  (dB) and PALSAR-2 odd scattering backscatters  $\sigma^0$  (dB) at different specular point incidence angles (a: 0-5°, b: 5-10°, c: 10-15°, d: 15-20°, e: 20-25°, f: 25-30°, g: 30-35°, h: 35-40°, i: 40-45°, j: 45-50°, k: 50-55°, l: 55-60°, m: 60-65°, and n: 65-70°). The statistical analysis results representing these relationships are described in Tables S2 and S3.

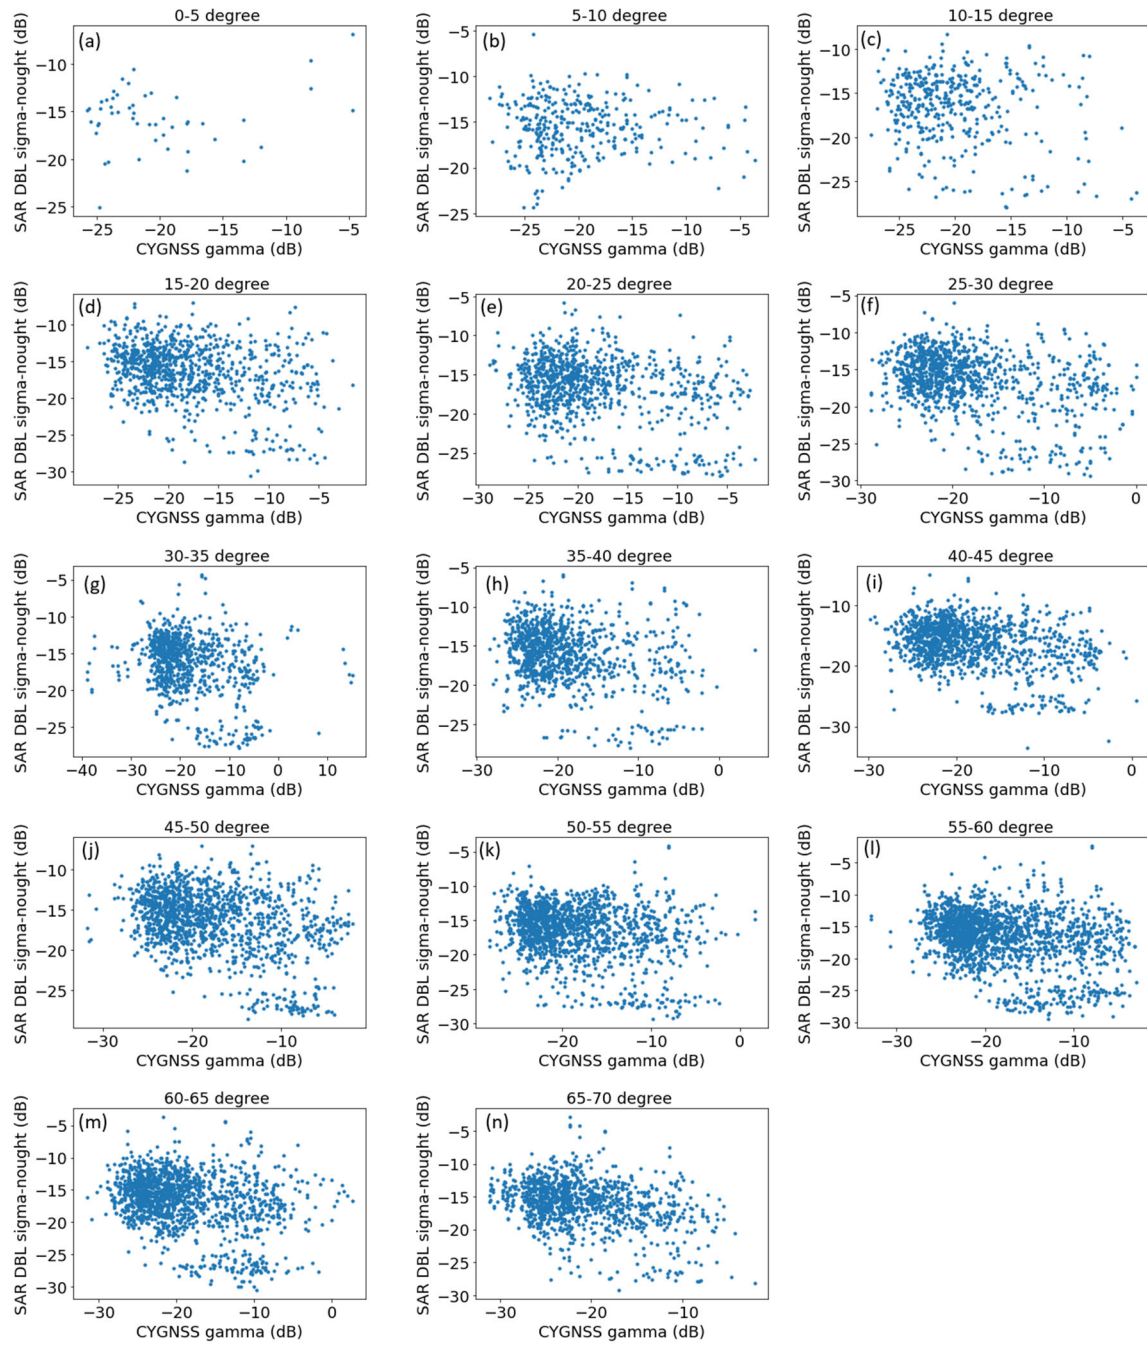

**Figure S4.** Two-dimensional scatterplots between the CyGNSS reflectivity  $\Gamma$  (dB) and PALSAR-2 double bounce backscatters  $\sigma^0$  (dB) at different specular point incidence angles (a: 0-5°, b: 5-10°, c: 10-15°, d: 15-20°, e: 20-25°, f: 25-30°, g: 30-35°, h: 35-40°, i: 40-45°, j: 45-50°, k: 50-55°, l: 55-60°, m: 60-65°, and n: 65-70°). The statistical analysis results representing these relationships are described in Tables S2 and S3.

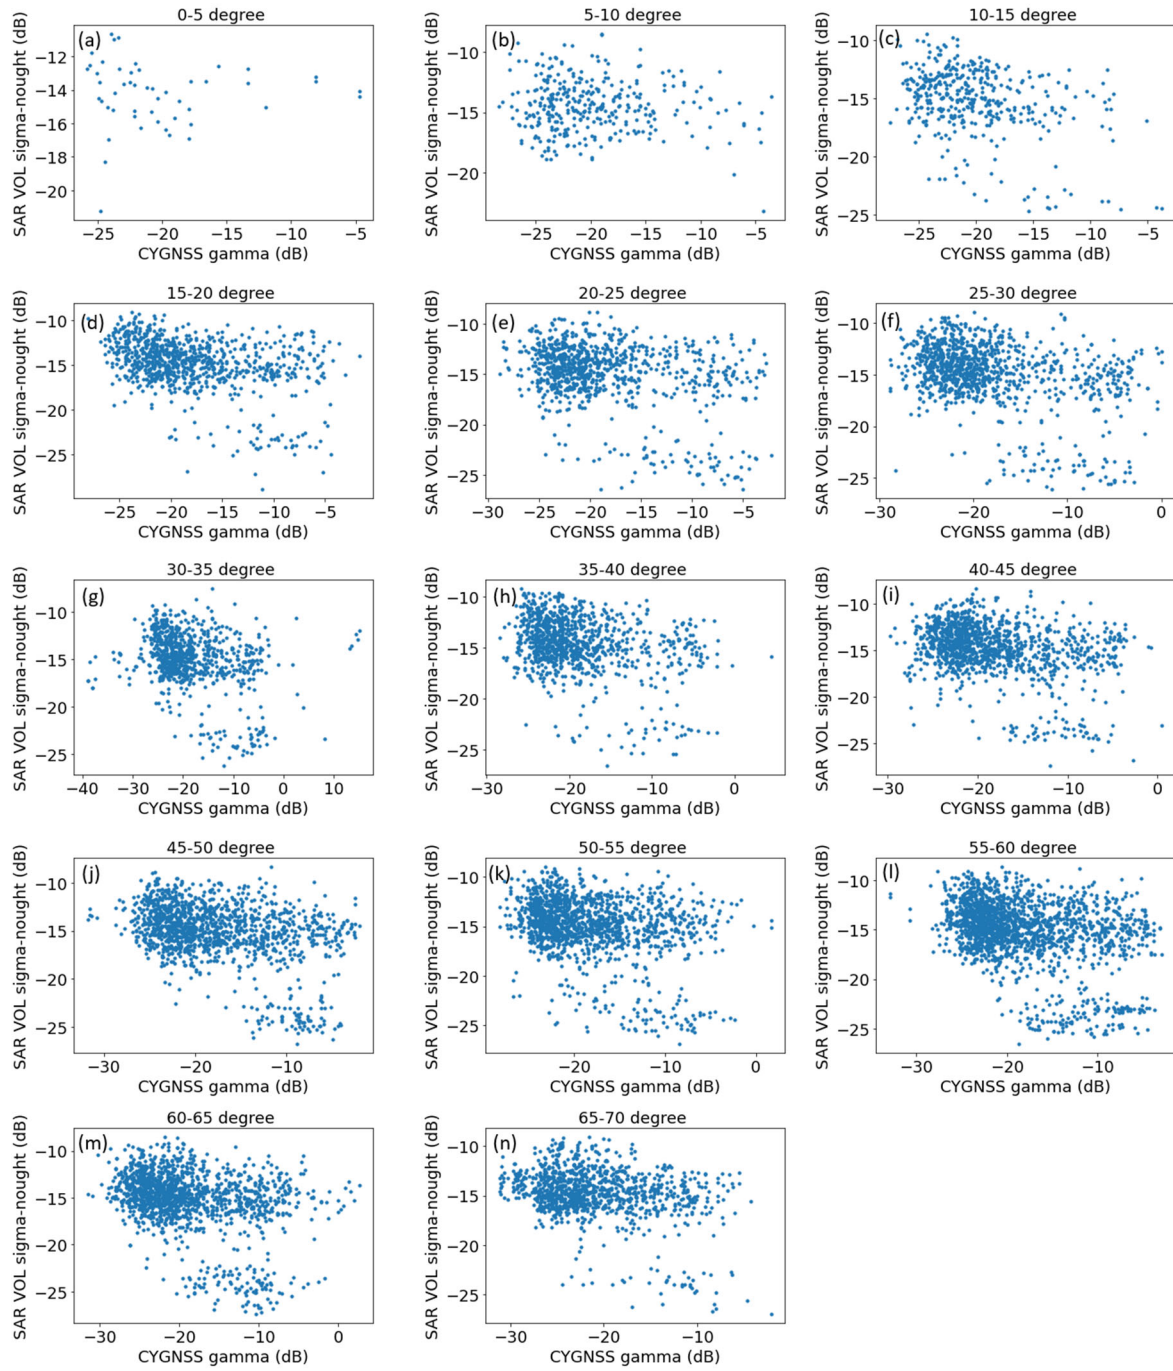

**Figure S5.** Two-dimensional scatterplots between the CyGNSS reflectivity  $\Gamma$  (dB) and PALSAR-2 volume diffusion backscatters  $\sigma^0$  (dB) at different specular point incidence angles (a: 0-5°, b: 5-10°, c: 10-15°, d: 15-20°, e: 20-25°, f: 25-30°, g: 30-35°, h: 35-40°, i: 40-45°, j: 45-50°, k: 50-55°, l: 55-60°, m: 60-65°, and n: 65-70°). The statistical analysis results representing these relationships are described in Tables S2 and S3.

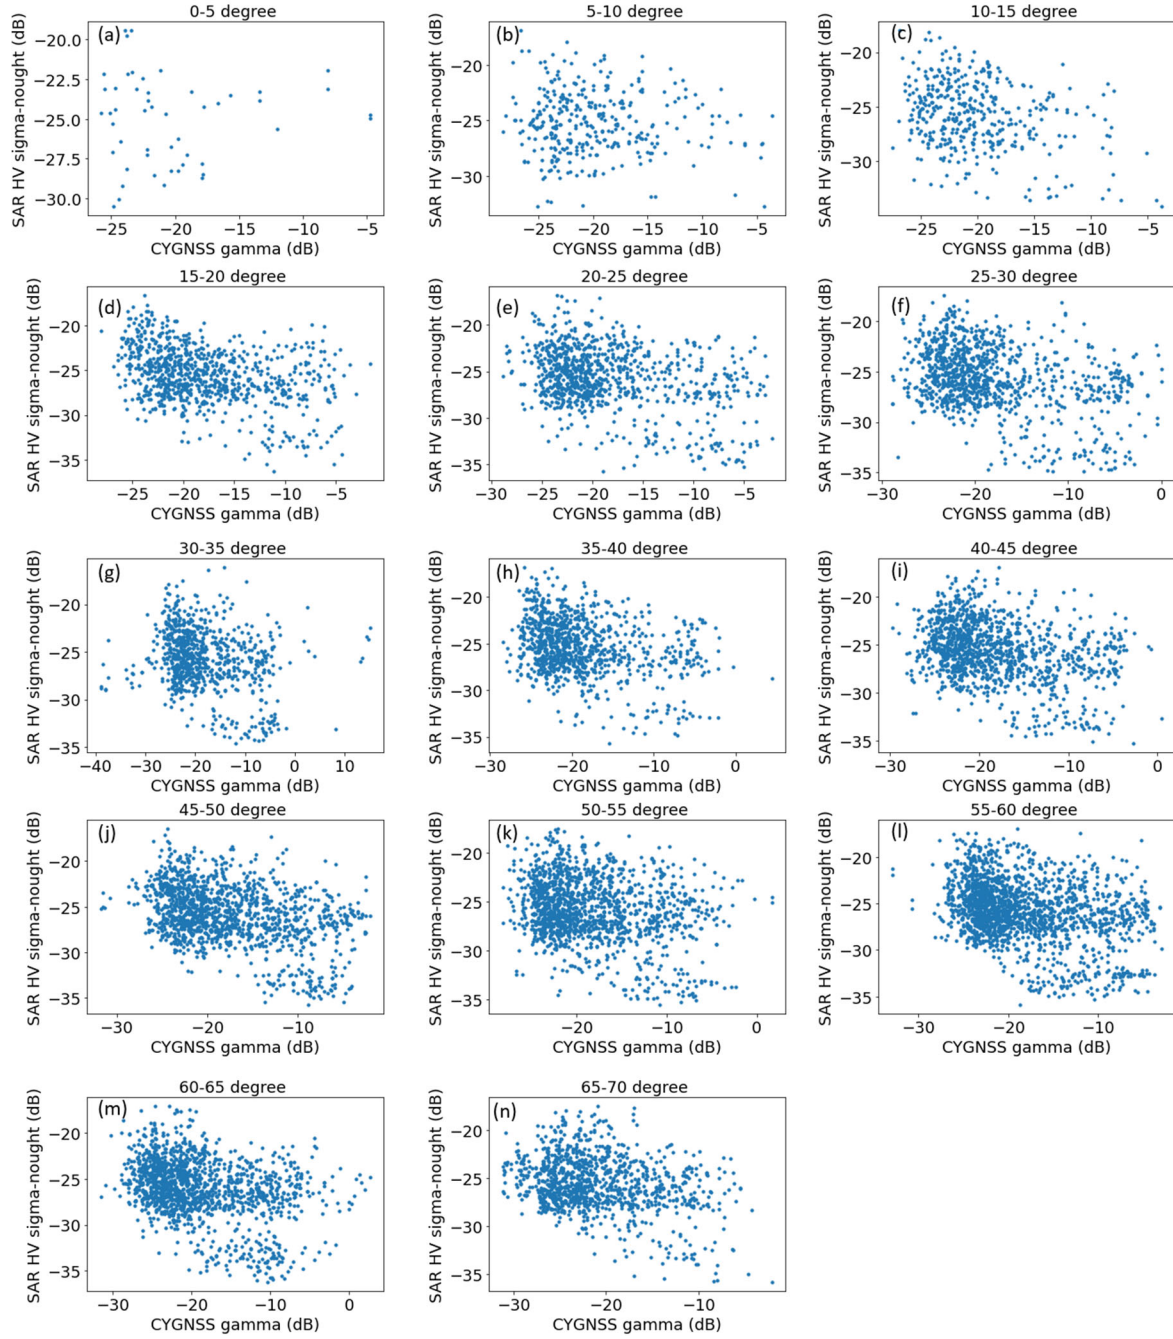

**Figure S6.** Two-dimensional scatterplots between the CyGNSS reflectivity  $\Gamma$  (dB) and PALSAR-2 backscatters HV  $\sigma^0$  (dB) at different specular point incidence angles (a: 0-5°, b: 5-10°, c: 10-15°, d: 15-20°, e: 20-25°, f: 25-30°, g: 30-35°, h: 35-40°, i: 40-45°, j: 45-50°, k: 50-55°, l: 55-60°, m: 60-65°, and n: 65-70°). The statistical analysis results representing these relationships are described in Tables S2 and S3.

**Table S2.** Pearson correlation coefficients between the CyGNSS  $\Gamma$  (dB) and PALSAR-2 backscatter  $\sigma^0$  (dB) values grouped by specular points' characteristics (5° incidence angle intervals and 6-km squared root effective scattering area intervals). The italicized, underscored red font indicates significantly positive correlations ( $p < 0.05$ ). Bold blue font with grey highlights indicates significantly negative correlations ( $p < 0.05$ ). The correlations marked with \*, \*\*, and \*\*\* denote significance at the 10 %, 5 %, and 1 % levels, respectively.

| Incidence angle (degree) | Square root of the effective scattering-area (km) | n   | Pearson correlation coefficients between $\Gamma$ (dB) and SAR backscatters $\sigma^0$ (dB) |                 |                 |                |                 |                 |                 |
|--------------------------|---------------------------------------------------|-----|---------------------------------------------------------------------------------------------|-----------------|-----------------|----------------|-----------------|-----------------|-----------------|
|                          |                                                   |     | Odd                                                                                         | Double          | Volume          | Inundation (%) | HH              | HV              | VV              |
| 0-5                      | 0-6                                               | 4   | 0.57                                                                                        | <u>0.97**</u>   | <u>0.94*</u>    | -0.91*         | <u>0.97**</u>   | <u>0.94*</u>    | <u>0.97**</u>   |
|                          | 6-12                                              | 8   | <u>0.72**</u>                                                                               | <u>0.72**</u>   | 0.12            | 0.42           | 0.39            | -0.32           | 0.49            |
|                          | 12-18                                             | 38  | -0.08                                                                                       | <u>0.37**</u>   | -0.00           | 0.25           | 0.02            | 0.07            | -0.02           |
| 5-10                     | 0-6                                               | 68  | -0.14                                                                                       | <b>-0.39***</b> | 0.085           | 0.01           | <b>-0.31**</b>  | 0.03            | -0.18           |
|                          | 6-12                                              | 60  | 0.13                                                                                        | 0.25*           | <u>0.41***</u>  | <b>-0.33**</b> | <u>0.36***</u>  | <u>0.40***</u>  | <u>0.27**</u>   |
|                          | 12-18                                             | 207 | -0.12*                                                                                      | 0.07            | <b>-0.22***</b> | 0.09           | -0.10           | <b>-0.15**</b>  | -0.07           |
| 10-15                    | 0-6                                               | 76  | <b>-0.47***</b>                                                                             | 0.19*           | -0.14           | <u>0.50***</u> | <b>-0.39***</b> | -0.22*          | <b>-0.36***</b> |
|                          | 6-12                                              | 33  | -0.27                                                                                       | 0.13            | -0.14           | <u>0.46***</u> | -0.22           | -0.05           | <b>-0.37**</b>  |
|                          | 12-18                                             | 294 | -0.06                                                                                       | <b>-0.18***</b> | <b>-0.39***</b> | -0.04          | -0.09           | <b>-0.35***</b> | -0.02           |
| 15-20                    | 0-6                                               | 116 | <b>-0.27***</b>                                                                             | <b>-0.26***</b> | <b>-0.31***</b> | <u>0.33***</u> | <b>-0.35***</b> | <b>-0.20**</b>  | <b>-0.23**</b>  |
|                          | 6-12                                              | 121 | -0.12                                                                                       | -0.12           | <b>-0.30***</b> | <u>0.20**</u>  | -0.13           | <b>-0.23**</b>  | -0.16*          |
|                          | 12-18                                             | 629 | 0.00                                                                                        | <b>-0.25***</b> | <b>-0.34***</b> | -0.05          | <b>-0.17***</b> | <b>-0.36***</b> | -0.04           |
| 20-25                    | 0-6                                               | 100 | <b>-0.21**</b>                                                                              | <b>-0.22**</b>  | <u>0.20**</u>   | 0.14           | <b>-0.21**</b>  | <u>0.19**</u>   | -0.06           |
|                          | 6-12                                              | 135 | <b>-0.34***</b>                                                                             | -0.12           | -0.04           | 0.12           | -0.05           | 0.05            | -0.00           |
|                          | 12-18                                             | 675 | 0.06                                                                                        | <b>-0.26***</b> | <b>-0.33***</b> | <b>-0.09**</b> | <b>-0.13***</b> | <b>-0.34***</b> | 0.03            |
| 25-30                    | 0-6                                               | 65  | <b>-0.55***</b>                                                                             | -0.14           | <b>-0.35***</b> | <u>0.36***</u> | <b>-0.37***</b> | <b>-0.30**</b>  | <b>-0.26**</b>  |
|                          | 6-12                                              | 211 | <b>-0.19***</b>                                                                             | 0.05            | -0.08           | <u>0.20***</u> | -0.06           | -0.03           | -0.08           |
|                          | 12-18                                             | 738 | <b>-0.10***</b>                                                                             | <b>-0.31***</b> | <b>-0.36***</b> | -0.03          | <b>-0.26***</b> | <b>-0.37***</b> | <b>-0.11***</b> |
|                          | 18-24                                             | 23  | -0.37*                                                                                      | -0.32           | <b>-0.51**</b>  | 0.33           | -0.38*          | <b>-0.48**</b>  | -0.28           |
|                          | 0-6                                               | 60  | 0.17                                                                                        | <u>0.33***</u>  | 0.12            | -0.10          | <u>0.52***</u>  | <u>0.38***</u>  | <u>0.37***</u>  |

|       |       |      |          |          |          |          |          |          |          |
|-------|-------|------|----------|----------|----------|----------|----------|----------|----------|
| 30-35 | 6-12  | 142  | -0.12    | -0.10    | -0.21**  | -0.01    | -0.04    | -0.01    | 0.01     |
|       | 12-18 | 472  | 0.08*    | -0.31*** | -0.28*** | -0.22    | -0.04    | -0.27    | 0.10     |
|       | 18-24 | 132  | -0.24*** | -0.16*   | -0.12    | 0.18**   | -0.17**  | -0.09    | -0.15    |
| 35-40 | 0-6   | 30   | -0.11    | -0.51*** | -0.18    | -0.14    | -0.25    | -0.24    | -0.12    |
|       | 6-12  | 141  | -0.20**  | -0.11    | -0.01    | 0.19**   | -0.28*** | -0.09    | -0.26*** |
|       | 12-18 | 434  | -0.01    | -0.25*** | -0.31*** | -0.05    | -0.14*** | -0.29*** | -0.03    |
|       | 18-24 | 397  | -0.10**  | -0.19*** | -0.31*** | 0.08     | -0.21*** | -0.30*** | -0.15*** |
| 40-45 | 0-6   | 80   | -0.02    | -0.17    | -0.11    | 0.08     | -0.13    | -0.19*   | -0.09    |
|       | 6-12  | 101  | -0.22**  | -0.00    | -0.16    | 0.28***  | -0.29*** | -0.15    | -0.26**  |
|       | 12-18 | 186  | 0.07     | -0.01    | 0.16**   | 0.01     | -0.01    | 0.11     | 0.04     |
|       | 18-24 | 845  | -0.09*** | -0.31*** | -0.34*** | -0.01    | -0.24*** | -0.34*** | -0.12*** |
| 45-50 | 0-6   | 68   | -0.00    | 0.10     | 0.04     | 0.16     | -0.01    | 0.00     | -0.13    |
|       | 6-12  | 38   | -0.46*** | -0.59*** | -0.62*** | 0.42***  | -0.68*** | -0.62*** | -0.62*** |
|       | 12-18 | 209  | -0.03    | -0.13*   | 0.01     | 0.09     | -0.11    | -0.05    | -0.15**  |
|       | 18-24 | 900  | -0.04    | -0.36*** | -0.39*** | -0.12*** | -0.21*** | -0.39*** | -0.04    |
|       | 24-30 | 137  | -0.11    | -0.27*** | -0.24*** | 0.28***  | -0.29*** | -0.29*** | -0.20**  |
| 50-55 | 0-6   | 60   | -0.03    | 0.00     | 0.14     | -0.09    | 0.05     | 0.14     | 0.03     |
|       | 6-12  | 10   | -0.64**  | -0.30    | -0.05    | -0.42    | -0.01    | 0.21     | 0.28     |
|       | 12-18 | 138  | 0.02     | -0.24*** | -0.01    | -0.22**  | -0.08    | -0.04    | -0.00    |
|       | 18-24 | 596  | -0.03    | -0.37*** | -0.39*** | -0.21*** | -0.11*** | -0.35*** | 0.04     |
|       | 24-30 | 639  | -0.05    | -0.03    | -0.19*** | 0.03     | -0.10**  | -0.17*** | -0.04    |
| 55-60 | 0-6   | 57   | -0.20    | -0.01    | -0.25*   | 0.11     | -0.04    | -0.23*   | -0.06    |
|       | 6-12  | 6    | -0.06    | -0.73*   | -0.45    | -0.77*   | -0.63    | -0.44    | -0.04    |
|       | 12-18 | 73   | -0.29**  | -0.27**  | -0.08    | 0.36***  | -0.31*** | -0.15    | -0.33*** |
|       | 18-24 | 59   | 0.20     | 0.33*    | 0.41***  | -0.15    | 0.20     | 0.33***  | 0.22*    |
|       | 24-30 | 1291 | 0.06**   | -0.30*** | -0.34*** | -0.16*** | -0.10*** | -0.34*** | 0.04     |
|       | 30-36 | 318  | -0.22*** | -0.08    | -0.20    | 0.32***  | -0.29*** | -0.22*** | -0.31*** |
| 60-65 | 0-6   | 16   | 0.46*    | -0.52**  | -0.61**  | -0.84*** | 0.47*    | -0.57**  | 0.71***  |
|       | 6-12  | 26   | -0.12    | -0.00    | -0.04    | 0.20     | -0.22    | -0.06    | -0.22    |
|       | 18-24 | 65   | -0.21    | -0.34**  | -0.19    | 0.20     | -0.43*** | -0.24**  | -0.34*** |

|       |       |     |       |          |          |                |          |          |         |
|-------|-------|-----|-------|----------|----------|----------------|----------|----------|---------|
|       | 24-30 | 324 | 0.00  | -0.39*** | -0.35*** | -0.30***       | -0.07    | -0.33*** | 0.07    |
|       | 30-36 | 796 | -0.01 | -0.23*** | -0.33*** | -0.08**        | -0.17*** | -0.34*** | -0.04   |
|       | 36-42 | 215 | 0.05  | 0.01     | -0.09    | <u>0.18***</u> | -0.13**  | -0.15**  | -0.10   |
| 65-70 | 0-6   | 17  | 0.05  | -0.02    | 0.01     | 0.05           | -0.51**  | -0.35    | -0.41** |
|       | 18-24 | 28  | -0.05 | -0.20    | 0.06     | 0.15           | -0.30    | -0.09    | -0.22   |
|       | 24-30 | 11  | -0.38 | -0.50    | -0.07    | -0.60**        | -0.03    | 0.18     | 0.22    |
|       | 36-42 | 370 | 0.06  | -0.42*** | -0.37*** | -0.24***       | -0.20*** | -0.37*** | -0.03   |
|       | 30-36 | 474 | 0.03  | -0.29*** | -0.28*** | -0.20***       | -0.08*   | -0.24*** | 0.07    |
|       | 42-48 | 202 | 0.02  | -0.19*** | -0.09    | -0.05**        | -0.13*   | -0.14**  | -0.02   |

**Table S3.** Determination coefficients ( $R^2$  values) of quadratic polynomial fittings [ $a \times \Gamma^2 + b \times \Gamma + c$ ] based on the use of CyGNSS  $\Gamma$  (dB) to estimate PALSAR-2 backscatters  $\sigma^0$  (dB) grouped by specular points' characteristics. The italicised, underscored red font with grey highlighting indicates downwardly convex nonlinear relationships (i.e.,  $0 < a$ ). The other plain texts indicate upwardly convex nonlinear relationships (i.e.,  $0 > a$ ).

| Incidence angle (degree) | Square root of the effective scattering-area (km) | n   | Determination coefficients ( $R^2$ ) of quadratic polynomial fittings [ $a \times \Gamma^2 + b \times \Gamma + c$ ] |             |             |                |             |             |             |
|--------------------------|---------------------------------------------------|-----|---------------------------------------------------------------------------------------------------------------------|-------------|-------------|----------------|-------------|-------------|-------------|
|                          |                                                   |     | Odd                                                                                                                 | Double      | Volume      | Inundation (%) | HH          | HV          | VV          |
| 0-5                      | 0-6                                               | 4   | <u>0.65</u>                                                                                                         | 0.96        | 0.99        | <u>1.00</u>    | 0.98        | 0.98        | 0.99        |
|                          | 6-12                                              | 8   | <u>0.70</u>                                                                                                         | 0.68        | <u>0.33</u> | 0.35           | <u>0.16</u> | <u>0.21</u> | <u>0.50</u> |
|                          | 12-18                                             | 38  | <u>0.07</u>                                                                                                         | <u>0.29</u> | <u>0.04</u> | 0.12           | <u>0.14</u> | <u>0.09</u> | <u>0.08</u> |
| 5-10                     | 0-6                                               | 68  | 0.09                                                                                                                | <u>0.18</u> | 0.03        | <u>0.05</u>    | 0.09        | <u>0.00</u> | 0.05        |
|                          | 6-12                                              | 60  | 0.08                                                                                                                | 0.11        | 0.19        | <u>0.11</u>    | 0.16        | 0.16        | 0.10        |
|                          | 12-18                                             | 207 | <u>0.03</u>                                                                                                         | 0.02        | 0.05        | 0.04           | <u>0.02</u> | 0.02        | <u>0.01</u> |
| 10-15                    | 0-6                                               | 76  | <u>0.23</u>                                                                                                         | 0.04        | 0.02        | <u>0.26</u>    | 0.20        | 0.11        | 0.18        |
|                          | 6-12                                              | 33  | 0.10                                                                                                                | <u>0.07</u> | 0.03        | 0.29           | <u>0.09</u> | 0.01        | <u>0.22</u> |
|                          | 12-18                                             | 294 | <u>0.03</u>                                                                                                         | 0.04        | 0.15        | 0.04           | <u>0.02</u> | 0.12        | <u>0.02</u> |

|       |       |     |             |             |             |             |             |             |             |
|-------|-------|-----|-------------|-------------|-------------|-------------|-------------|-------------|-------------|
| 15-20 | 0-6   | 116 | <u>0.08</u> | 0.08        | 0.10        | <u>0.11</u> | 0.13        | 0.05        | 0.07        |
|       | 6-12  | 121 | 0.01        | <u>0.04</u> | <u>0.09</u> | 0.04        | <u>0.04</u> | <u>0.06</u> | <u>0.03</u> |
|       | 12-18 | 629 | <u>0.01</u> | 0.06        | <u>0.12</u> | 0.04        | <u>0.06</u> | <u>0.15</u> | <u>0.04</u> |
| 20-25 | 0-6   | 100 | <u>0.05</u> | <u>0.05</u> | <u>0.05</u> | <u>0.02</u> | <u>0.07</u> | <u>0.05</u> | <u>0.01</u> |
|       | 6-12  | 135 | <u>0.12</u> | 0.02        | <u>0.01</u> | 0.04        | <u>0.01</u> | <u>0.02</u> | <u>0.01</u> |
|       | 12-18 | 675 | <u>0.00</u> | 0.07        | 0.11        | 0.02        | <u>0.02</u> | <u>0.12</u> | <u>0.00</u> |
| 25-30 | 0-6   | 65  | <u>0.33</u> | <u>0.03</u> | <u>0.16</u> | 0.14        | <u>0.15</u> | <u>0.14</u> | <u>0.07</u> |
|       | 6-12  | 211 | 0.04        | 0.04        | 0.02        | 0.04        | 0.02        | 0.01        | 0.03        |
|       | 12-18 | 738 | <u>0.01</u> | <u>0.10</u> | <u>0.13</u> | <u>0.00</u> | <u>0.07</u> | <u>0.14</u> | 0.01        |
|       | 18-24 | 23  | <u>0.14</u> | <u>0.11</u> | 0.27        | <u>0.12</u> | <u>0.15</u> | 0.24        | <u>0.08</u> |
| 30-35 | 0-6   | 60  | 0.27        | <u>0.12</u> | 0.17        | <u>0.23</u> | 0.28        | 0.16        | 0.24        |
|       | 6-12  | 142 | <u>0.05</u> | 0.13        | 0.12        | 0.06        | 0.00        | 0.07        | <u>0.01</u> |
|       | 12-18 | 472 | <u>0.02</u> | <u>0.10</u> | <u>0.09</u> | 0.05        | <u>0.01</u> | <u>0.08</u> | <u>0.01</u> |
|       | 18-24 | 132 | <u>0.11</u> | <u>0.15</u> | <u>0.06</u> | 0.03        | <u>0.08</u> | <u>0.04</u> | <u>0.05</u> |
| 35-40 | 0-6   | 30  | 0.13        | <u>0.29</u> | 0.07        | <u>0.06</u> | 0.08        | 0.07        | 0.06        |
|       | 6-12  | 141 | <u>0.04</u> | 0.01        | 0.00        | <u>0.04</u> | <u>0.08</u> | 0.01        | <u>0.07</u> |
|       | 12-18 | 434 | <u>0.00</u> | <u>0.07</u> | 0.10        | 0.00        | <u>0.04</u> | <u>0.09</u> | <u>0.01</u> |
|       | 18-24 | 397 | <u>0.02</u> | 0.04        | <u>0.10</u> | 0.03        | <u>0.05</u> | <u>0.09</u> | <u>0.03</u> |
| 40-45 | 0-6   | 80  | <u>0.00</u> | <u>0.05</u> | 0.01        | 0.01        | <u>0.02</u> | 0.04        | <u>0.01</u> |
|       | 6-12  | 101 | 0.06        | 0.04        | 0.13        | <u>0.08</u> | 0.09        | 0.05        | 0.07        |
|       | 12-18 | 186 | 0.02        | 0.00        | 0.04        | <u>0.01</u> | 0.00        | 0.02        | 0.01        |
|       | 18-24 | 845 | <u>0.01</u> | 0.10        | <u>0.12</u> | 0.01        | <u>0.06</u> | <u>0.13</u> | <u>0.02</u> |
| 45-50 | 0-6   | 68  | 0.02        | <u>0.01</u> | 0.02        | <u>0.03</u> | 0.00        | 0.00        | 0.02        |
|       | 6-12  | 38  | <u>0.22</u> | 0.36        | 0.39        | 0.17        | 0.46        | 0.41        | 0.39        |
|       | 12-18 | 209 | <u>0.01</u> | 0.04        | <u>0.00</u> | 0.02        | <u>0.01</u> | 0.00        | <u>0.02</u> |
|       | 18-24 | 900 | <u>0.01</u> | 0.13        | <u>0.15</u> | 0.02        | <u>0.05</u> | <u>0.15</u> | <u>0.01</u> |
|       | 24-30 | 137 | 0.02        | 0.08        | 0.07        | <u>0.09</u> | 0.08        | 0.09        | 0.04        |
|       | 0-6   | 60  | 0.00        | 0.04        | 0.08        | 0.11        | 0.00        | 0.06        | <u>0.01</u> |
|       | 6-12  | 10  | <u>0.41</u> | <u>0.15</u> | 0.03        | <u>0.23</u> | <u>0.00</u> | 0.05        | <u>0.08</u> |

|       |       |      |             |             |             |             |             |             |             |
|-------|-------|------|-------------|-------------|-------------|-------------|-------------|-------------|-------------|
| 50-55 | 12-18 | 138  | <u>0.06</u> | <u>0.10</u> | <u>0.04</u> | 0.05        | <u>0.06</u> | <u>0.05</u> | <u>0.04</u> |
|       | 18-24 | 596  | <u>0.04</u> | 0.15        | 0.16        | 0.07        | <u>0.02</u> | 0.13        | <u>0.02</u> |
|       | 24-30 | 639  | <u>0.03</u> | <u>0.00</u> | <u>0.05</u> | 0.03        | <u>0.03</u> | <u>0.03</u> | <u>0.02</u> |
| 55-60 | 0-6   | 57   | <u>0.05</u> | <u>0.08</u> | <u>0.07</u> | 0.02        | <u>0.08</u> | <u>0.06</u> | <u>0.04</u> |
|       | 6-12  | 6    | <u>0.04</u> | <u>0.70</u> | <u>0.33</u> | 0.61        | <u>0.80</u> | <u>0.31</u> | <u>0.72</u> |
|       | 12-18 | 73   | <u>0.19</u> | 0.08        | <u>0.01</u> | 0.19        | <u>0.11</u> | <u>0.02</u> | <u>0.16</u> |
|       | 18-24 | 59   | <u>0.05</u> | 0.16        | <u>0.17</u> | 0.02        | 0.08        | 0.13        | 0.06        |
|       | 24-30 | 1291 | <u>0.01</u> | <u>0.09</u> | <u>0.12</u> | 0.03        | <u>0.01</u> | <u>0.12</u> | <u>0.00</u> |
|       | 30-36 | 318  | <u>0.07</u> | <u>0.01</u> | <u>0.05</u> | 0.11        | <u>0.09</u> | <u>0.05</u> | <u>0.10</u> |
| 60-65 | 0-6   | 16   | 0.33        | 0.36        | 0.52        | <u>0.72</u> | 0.50        | 0.46        | 0.59        |
|       | 6-12  | 26   | 0.11        | <u>0.01</u> | 0.01        | <u>0.20</u> | 0.12        | 0.02        | 0.17        |
|       | 18-24 | 65   | 0.10        | 0.13        | 0.14        | <u>0.08</u> | 0.24        | 0.12        | 0.17        |
|       | 24-30 | 324  | <u>0.01</u> | <u>0.15</u> | <u>0.13</u> | 0.09        | <u>0.01</u> | <u>0.12</u> | <u>0.01</u> |
|       | 30-36 | 796  | <u>0.00</u> | <u>0.05</u> | <u>0.11</u> | 0.01        | <u>0.03</u> | <u>0.12</u> | <u>0.00</u> |
|       | 36-42 | 215  | 0.04        | 0.01        | <u>0.01</u> | <u>0.04</u> | 0.03        | <u>0.02</u> | 0.04        |
| 65-70 | 0-6   | 17   | 0.15        | <u>0.01</u> | <u>0.02</u> | <u>0.08</u> | <u>0.33</u> | <u>0.12</u> | 0.26        |
|       | 18-24 | 28   | 0.01        | 0.09        | 0.02        | 0.04        | 0.09        | 0.02        | <u>0.05</u> |
|       | 24-30 | 11   | 0.24        | 0.27        | 0.04        | 0.37        | 0.00        | 0.07        | 0.06        |
|       | 36-42 | 370  | 0.01        | 0.18        | 0.14        | <u>0.06</u> | <u>0.04</u> | 0.14        | <u>0.00</u> |
|       | 30-36 | 474  | 0.00        | 0.10        | 0.09        | <u>0.04</u> | 0.01        | 0.08        | 0.01        |
|       | 42-48 | 202  | 0.01        | 0.04        | 0.02        | <u>0.03</u> | 0.03        | 0.05        | 0.02        |
